# Supplementary material for: Role of the CrcB transporter of Pseudomonas putida in the multi‐level stress response elicited by mineral fluoride
Source: PubMed Central journal article supplement — Environ Microbiol. 2022 Jul 1;24(11):5082–104. doi: 10.1111/1462-2920.16110 (PMC9796867; doi:10.1111/1462-2920.16110), 2022-07-01
Supplement: EMI-24-5082-s001.pdf [file EMI-24-5082-s001.pdf]

## SUPPORTING INFORMATION

### Role of the *CrcB* transporter of *Pseudomonas putida* in the multi-level stress response elicited by mineral fluoride

Patricia Calero, Nicolás Gurdo, and Pablo I. Nikel

**Table S1.** Oligonucleotides used in this study.

| Name                 | Sequence (5'→3')                   | Purpose                                        |
|----------------------|------------------------------------|------------------------------------------------|
| <i>rarA</i> _up_U_fw | AGATCCUTCGCATGCTGTTGGTTTC          | Upstream region of <i>rarA</i> amplification   |
| <i>rarA</i> _up_U_rv | ATGGCAUGGCGAGCTCTGGTTACTC          |                                                |
| <i>rarA</i> _dw_U_fw | ATGCCAUGATTGCACTCATCGCCGC          | Downstream region of <i>rarA</i> amplification |
| <i>rarA</i> _dw_U_rv | AGGTCGACUTTCGTTGGCCATGCGCTC        |                                                |
| <i>prtR</i> _up_U_fw | AGATCCUAAAGTTATTCCTGATCGGGAAT      | Upstream region of <i>prtR</i> amplification   |
| <i>prtR</i> _up_U_rv | ATCGTCAUUTCAGTCTCCGCAAGGCC         |                                                |
| <i>prtR</i> _dw_U_fw | ATGACGAUCAGCTCAACTCCAGCCAGATCGG    | Downstream region of <i>prtR</i> amplification |
| <i>prtR</i> _dw_U_rv | AGGTCGACUACCGCCGCTGAGCCTGCACAA     |                                                |
| <i>lapA</i> _up_U_fw | AGATCCUATTCATCTATAGAGTGCGGATTC     | Upstream region of <i>lapA</i> amplification   |
| <i>lapA</i> _up_U_rv | ATTGGACUCTCCGTGTGACCCGATGG         |                                                |
| <i>lapA</i> _dw_U_fw | AGTCCAAUGTGACAGACCACGGGGCC         | Downstream region of <i>lapA</i> amplification |
| <i>lapA</i> _dw_U_rv | AGGTCGACUTCGATTGGTCGACGGGTACG      |                                                |
| <i>lapD</i> _up_U_fw | AGATCCUCGGATTGGGATTTCTCCC          | Upstream region of <i>lapD</i> amplification   |
| <i>lapD</i> _up_U_rv | ATTCACATCUGTGCTCCTTCAGTAAACCG      |                                                |
| <i>lapD</i> _dw_U_fw | AGATGTGAAUGGCCTCTCGCGTGCCGCT       | Downstream region of <i>lapD</i> amplification |
| <i>lapD</i> _dw_U_rv | AGGTCGACUACGCGGTATCGTCAAGCAACTGC   |                                                |
| <i>flhA</i> _up_U_fw | AGATCCUCTTACCGGCATACGACTCA         | Upstream region of <i>flhA</i> amplification   |
| <i>flhA</i> _up_U_rv | ACCGCGAGUCCTCTTGATGCAAACTTTGA      |                                                |
| <i>flhA</i> _dw_U_fw | ACTCGCGGUGTGAGGTAGGGGATAATGCAAGTTA | Downstream region of <i>flhA</i> amplification |
| <i>flhA</i> _dw_U_rv | AGGTCGACUGCGCCAGGCCTGGCGCGG        |                                                |
| <i>yijP</i> _up_U_fw | AGATCCUTCCTGGCGCATGATGACGAT        | Upstream region of <i>yijP</i> amplification   |
| <i>yijP</i> _up_U_rv | ATTACACGUATGCCTCGTCGTACCTTGGC      |                                                |
| <i>yijP</i> _dw_U_fw | ACGTGTAAUCAGGCCAAGGTTTCATGCAGGG    | Downstream region of <i>yijP</i> amplification |
| <i>yijP</i> _dw_U_rv | AGGTCGACUCGCCACCCGAGTCGCTG         |                                                |
| <i>orn</i> _up_U_fw  | AGATCCUTACCAGATAGCGGTGATCA         | Upstream region of <i>orn</i> amplification    |
| <i>orn</i> _up_U_rv  | ACTCACAUGCAGGGGCTCCTCATATAG        |                                                |
| <i>orn</i> _dw_U_fw  | ATGTGAGUCGAAACGGCGCAGATATTGTA      | Downstream region of <i>orn</i> amplification  |
| <i>orn</i> _dw_U_rv  | AGGTCGACUATCGCTGTTCTGCCGGC         |                                                |
| <i>dusB</i> _up_U_fw | AGATCCUAATGGCCCGCAGGACCA           | Upstream region of <i>dusB</i> amplification   |
| <i>dusB</i> _up_U_rv | ATGCCAUAGGTGATCCCTGTTGTGGGGC       |                                                |
| <i>dusB</i> _dw_U_fw | ATGGCAUGACGATGATGACCAGAA           | Downstream region of <i>dusB</i> amplification |
| <i>dusB</i> _dw_U_rv | AGGTCGACUCATCCATCATTTCCGGCGA       |                                                |

---

|              |                                |                                                |
|--------------|--------------------------------|------------------------------------------------|
| vacB_up_U_fw | AGATCCUGGCACATAAATCGCAGGCAAGA  | Upstream region of <i>vacB</i> amplification   |
| vacB_up_U_rv | ATGACAUCAGAAGGGGTTACCTTGGGGTAT |                                                |
| vacB_dw_U_fw | ATGTCAUGAGTCAGCTGGAAAAATCT     | Downstream region of <i>vacB</i> amplification |
| vacB_dw_U_rv | AGGTCGACUGATCATCACCAGTGGCCC    |                                                |

---

**Table S2.** Beneficial insertions in the tolerance of *P. putida* towards F<sup>-</sup> stress.<sup>a</sup>

| Gene           | Locus   | Insertions | log(FC) | P-value                | Description                                                                                  | References                                                       | Comments                                                                                                                                                                                                                                              |
|----------------|---------|------------|---------|------------------------|----------------------------------------------------------------------------------------------|------------------------------------------------------------------|-------------------------------------------------------------------------------------------------------------------------------------------------------------------------------------------------------------------------------------------------------|
| <i>om</i>      | PP_4902 | 2          | 3.21    | 4.39×10 <sup>-12</sup> | Oligoribonuclease                                                                            | (Yeom, et al., 2010, Escapa, et al., 2012)                       | Involved in PHA metabolism in <i>P. putida</i> . Exoribonuclease activity, produces 5'-phosphomonoesters. Changes in expression reported in the presence of ampicillin.                                                                               |
| <i>dusB</i>    | PP_4820 | 6          | 2.68    | 2.77×10 <sup>-11</sup> | NifR3 family TIM-barrel protein                                                              | (Steen, et al., 2013, Laheasaare, et al., 2016)                  | tRNA dihydrouridine synthase DusB. Differentially regulated in strain KT2440 after 30 min of O <sub>2</sub> depletion. Forms an operon with <i>PP_4821</i> (encoding Fis). Fis is involved in the regulation of LapF and cell surface hydrophobicity. |
| <i>vacB/mr</i> | PP_4880 | 15         | 2.81    | 2.51×10 <sup>-7</sup>  | Ribonuclease R                                                                               | (Reva, et al., 2006, Fonseca, et al., 2011, Frank, et al., 2011) | Essential for growth of strain KT2440 at 4°C. Exoribonuclease activity, digests RNA with extensive secondary structure. Its absence leads to increased levels of many mRNAs (among them, <i>flaQ</i> and other flagella genes).                       |
| <i>argD</i>    | PP_4481 | 1          | 2.52    | 2.47×10 <sup>-6</sup>  | Bifunctional <i>N</i> -succinyldiaminopimelate-aminotransferase/acetylornithine transaminase | —                                                                | Involved in L-arginine biosynthesis.                                                                                                                                                                                                                  |
| <i>kdsA-1</i>  | PP_1611 | 2          | 2.65    | 2.88×10 <sup>-6</sup>  | 2-Dehydro-3-deoxyphosphooctonate aldolase                                                    | (Walsh, et al., 1999)                                            | Involved in lipopolysaccharide biosynthesis.                                                                                                                                                                                                          |

<sup>a</sup> *FC*, fold-change; *TIM-barrel*, triose phosphate isomerase barrel. The references in the table indicate reports of the corresponding gene or function in either *P. putida* KT2440 or related species.

## SUPPLEMENTARY FIGURES

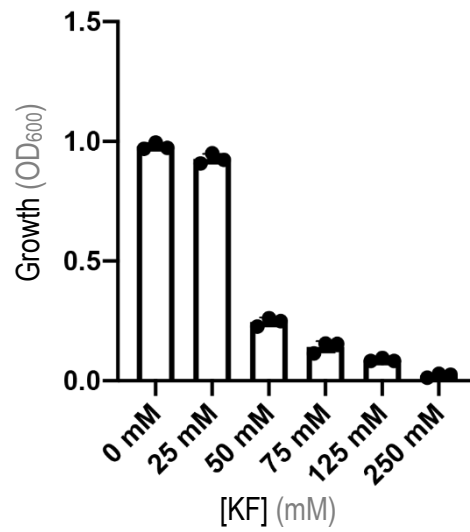

**Figure S1 · Effect of KF on bacterial growth.** Growth of *P. putida* KT2440 in M9 minimal medium containing 5 g L<sup>-1</sup> glucose as the sole carbon source and supplemented with KF at the different concentrations indicated. Dots represent individual data per experiment with at least three independent cultures analyzed per condition. OD<sub>600</sub>, optical density measured at 600 nm.

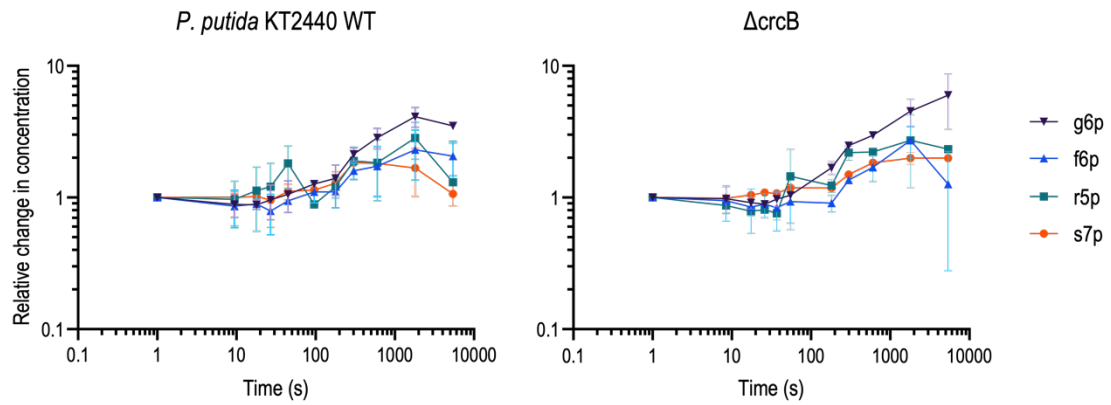

**Figure S2 · Metabolomic analysis of sugar phosphates.** Relative change in the metabolite concentration over time of metabolites of the upper glycolysis pathway in presence of NaF compared to control conditions in *P. putida* KT2440 and *P. putida*  $\Delta$ crcB. Error bars correspond to standard deviations of two biological replicates. g6p, glucose 6-phosphate; f6p, fructose 6-phosphate; r5p, ribose 5-phosphate; and s7p, sedoheptulose 7-phosphate.

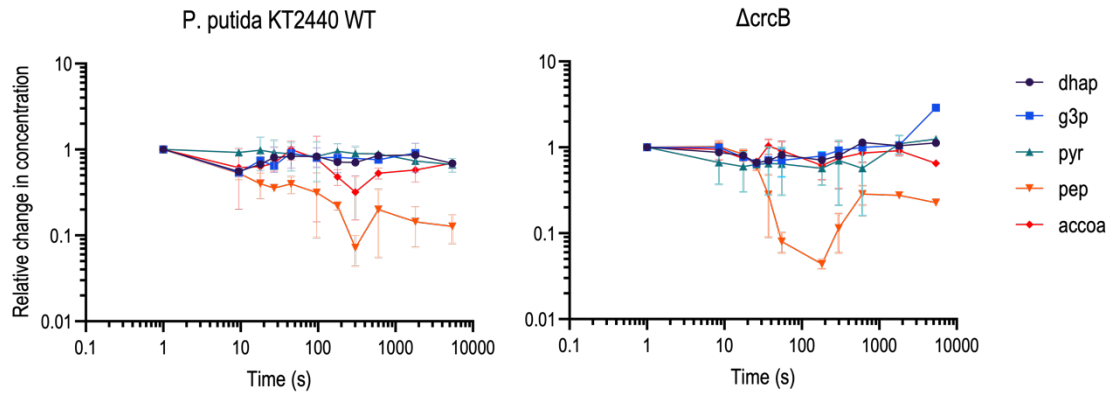

**Figure S3 · Metabolomic analysis of intermediates of the lower glycolysis.** Relative change in the concentration over time of metabolites of the lower glycolysis pathway in presence of NaF compared to control conditions in *P. putida* KT2440 and *P. putida*  $\Delta$ *crcB*. Error bars correspond to standard deviations of two biological replicates. dhap, dihydroxyacetone phosphate; g3p, glyceraldehyde 3-phosphate; pyr, pyruvate; pep, phosphoenol pyruvate; and accoa, acetyl-coenzyme A.

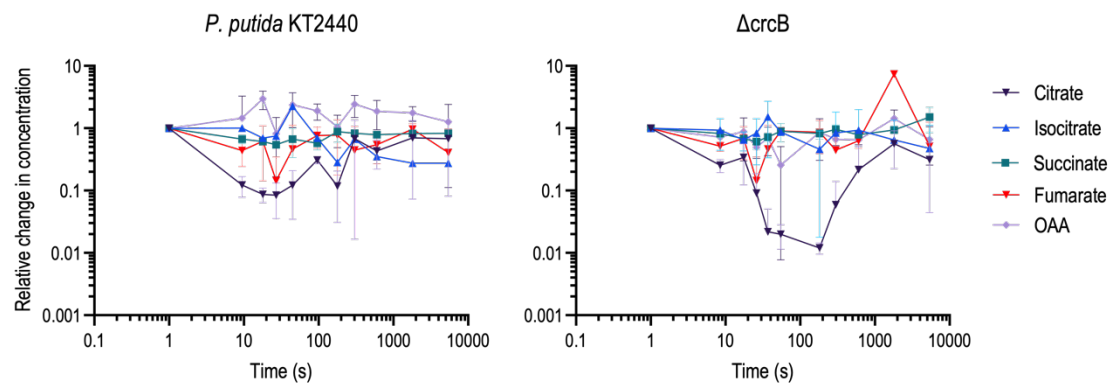

**Figure S4 · Metabolomic analysis of intermediates of the tricarboxylic acid cycle.** Relative change in the concentration over time of metabolites of the tricarboxylic acid cycle in presence of NaF compared to control conditions in *P. putida* KT2440 and *P. putida*  $\Delta$ crcB. Error bars correspond to standard deviations of two biological replicates. OAA, oxaloacetate.

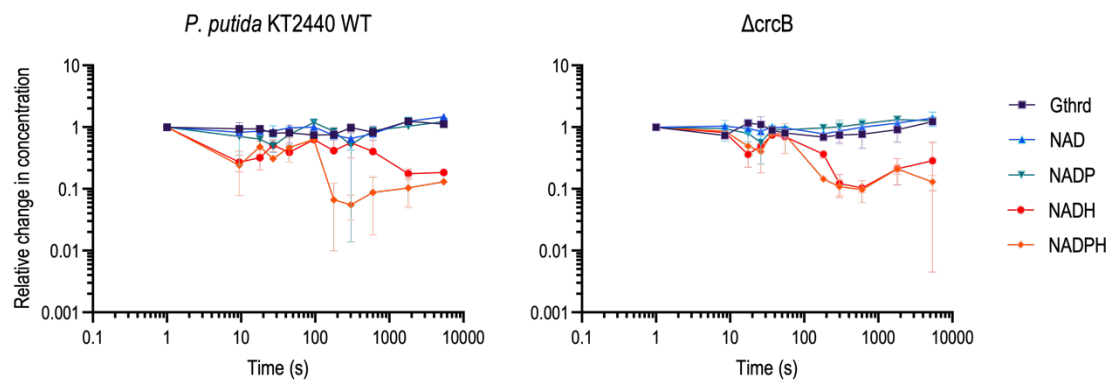

**Figure S5 · Metabolomic analysis of redox cofactors and related metabolites.** Relative change in the concentration over time of metabolites involved in redox balance in presence of NaF compared to control conditions in *P. putida* KT2440 and *P. putida*  $\Delta$ crcB. Error bars correspond to standard deviations of two biological replicates. Gthrd, reduced glutathione.



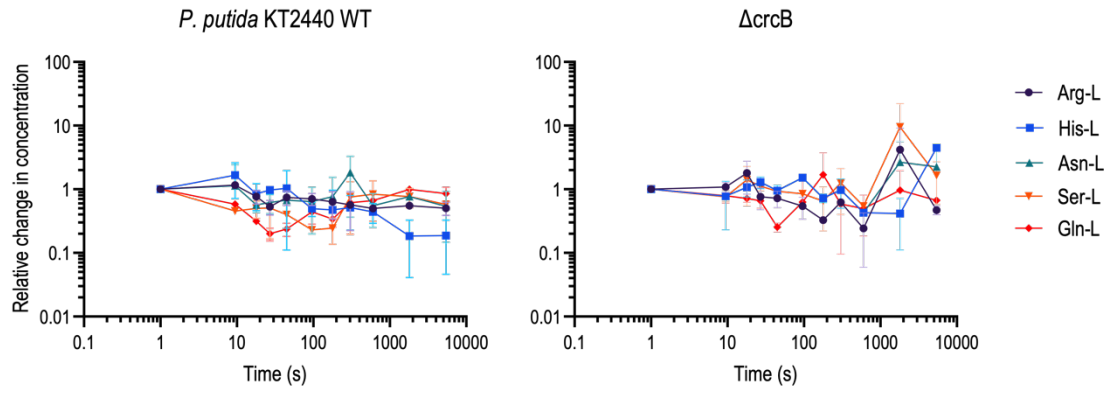

**Figure S6 · Metabolomic analysis of intracellular amino acids.** Relative change in the concentration over time of amino acids in presence of NaF compared to control conditions in *P. putida* KT2440 and *P. putida*  $\Delta$ crcB. Error bars correspond to standard deviations of two biological replicates.

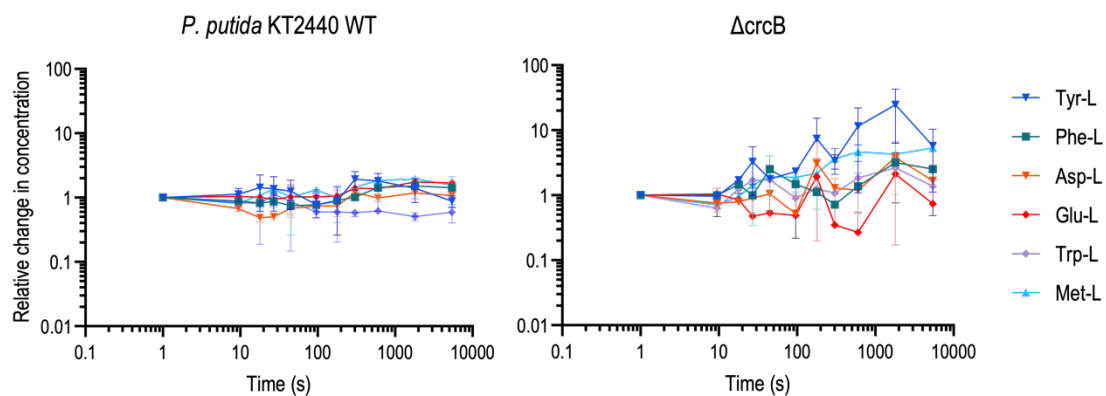

**Figure S7 · Metabolomic analysis of intracellular (aromatic and sulphur-containing) amino acids.** Relative change in the concentration over time of amino acids in presence of NaF compared to control conditions in *P. putida* KT2440 and *P. putida*  $\Delta$ crcB. Error bars correspond to standard deviations of two biological replicates.
